# Supplementary material
Source: ML conference proceedings conference paper supplement (https://openreview.net/forum?id=lVUGfLpNpCF)
Supplement: supplementary_material [file attachment]

## 342 A Model details

343 **Equations for the four-learning rate case.** In Sec. 3, for the purpose of clarity, we presented  
 344 the equations for our SRWM model in the case where we only have a single learning rate  $\beta_t$ .  
 345 Here we provide a complete description of an SRWM with a separate self-invited learning rate  
 346 for each component. As we noted in Sec. 3, the SRWM can be split into sub-matrices:  $\mathbf{W}_{t-1} =$   
 347  $[\mathbf{W}_{t-1}^y, \mathbf{W}_{t-1}^q, \mathbf{W}_{t-1}^k, \mathbf{W}_{t-1}^\beta]$  according to the sub-components used to produce  $\mathbf{y}_t, \mathbf{q}_t, \mathbf{k}_t$ , and  $\beta_t$   
 348 in Eq. 5. In case where we use separate learning rates, we need separate equations to describe the  
 349 update of each sub-matrices. For example, for the “y”-part  $\mathbf{W}_{t-1}^y$ , while keeping the same equation  
 350 for the first projection (Eq. 5), the rest becomes:

$$\mathbf{y}_t^k = \mathbf{W}_{t-1}^y \phi(\mathbf{k}_t) \quad (9)$$

$$\mathbf{y}_t^q = \mathbf{W}_{t-1}^y \phi(\mathbf{q}_t) \quad (10)$$

$$\mathbf{W}_t^y = \mathbf{W}_{t-1}^y + \sigma(\beta_{y,t})(\mathbf{y}_t^q - \mathbf{y}_t^k) \otimes \phi(\mathbf{k}_t) \quad (11)$$

351 where  $\mathbf{y}_t^k$  and  $\mathbf{y}_t^q$  are the “y”-part of  $\bar{\mathbf{v}}_t$  and  $\mathbf{v}_t$  in Eq. 6 and 7 respectively, and  $\beta_{y,t} \in \mathbb{R}$  is one of four  
 352 learning rate dedicated to the “y”-part. The equations for other sub-matrices  $\mathbf{W}_{t-1}^q, \mathbf{W}_{t-1}^k, \mathbf{W}_{t-1}^\beta$   
 353 are analogous.

354 **Use of multiple heads.** In this work, the SRWM was inserted between other layers with learned  
 355 parameters with configurable dimensionalities. This allows us for an efficient computation using  
 356 multiple heads for computation described as follows. Given a number of heads  $H$  which we use in  
 357 the SRWM layer, we configured the model dimensions such that the input dimension to an SRWM  
 358 layer  $d_{\text{in}}$  is divisible by  $H$ . The input is then split into  $H$  equally sized components, and each head  
 359 executes separate SRWM operations (Eqs. 5-8) on one of the input components. In consequence, the  
 360 SRWM with the same model hyper-parameters as the DeltaNet has less parameters than the DeltaNet.  
 361 For example, if  $d_{\text{in}} = d_{\text{key}}$ , the common head dimension is  $d = d_{\text{in}}/H$ , the parameter shape of key  
 362 projection in the SRWM is  $(H, d, d)$  while it is  $(d_{\text{in}}, d_{\text{in}}) = (H * d, H * d)$  for the DeltaNet. In case  
 363 the input size of the SRWM layer is not configurable, this option has to be disabled and a single head  
 364 version should be used.

## 365 B Extra result tables

Table 3: Performance on ProcGen game environments. Multi-task training in 6 environments in the **easy distribution**. The three variants of the SRWM are as follows: *True*: the SRWM model, *Fake*: the SRWM model without self-modification mechanism, and *Reset*: the SRWM trained and evaluated with weight update reset.

| Env        | Split | FF                | LSTM             | Delta             | SRM               |                  |            |
|------------|-------|-------------------|------------------|-------------------|-------------------|------------------|------------|
|            |       |                   |                  |                   | True              | Fake             | Reset      |
| Bigfish    | Train | 8.3 (3.9)         | 6.5 (2.0)        | 19.6 (4.0)        | <b>20.1</b> (2.4) | 11.6 (5.7)       | 15.7 (2.8) |
|            | Test  | 4.3 (2.3)         | 3.2 (1.1)        | 7.8 (1.5)         | <b>9.0</b> (2.0)  | 4.7 (2.4)        | 5.8 (1.3)  |
| Fruitbot   | Train | <b>29.2</b> (0.2) | 27.8 (0.5)       | 28.8 (0.9)        | 28.7 (0.2)        | 27.8 (1.3)       | 29.2 (0.2) |
|            | Test  | <b>25.6</b> (1.1) | 24.8 (0.7)       | 24.5 (1.5)        | 25.5 (1.0)        | 24.6 (1.2)       | 25.2 (1.4) |
| Leaper     | Train | 3.3 (0.2)         | 3.3 (0.2)        | <b>3.5</b> (0.4)  | <b>3.5</b> (0.2)  | 3.3 (0.3)        | 3.4 (0.2)  |
|            | Test  | 3.4 (0.4)         | <b>3.6</b> (0.4) | 3.3 (0.4)         | 3.4 (0.4)         | <b>3.6</b> (0.4) | 3.5 (0.3)  |
| Maze       | Train | 1.9 (0.3)         | 3.1 (0.7)        | <b>3.8</b> (0.2)  | 3.6 (0.5)         | 3.2 (0.2)        | 2.9 (0.2)  |
|            | Test  | 1.4 (0.3)         | 1.6 (0.4)        | 1.7 (0.2)         | <b>1.8</b> (0.5)  | 1.3 (0.3)        | 1.5 (0.3)  |
| Plunder    | Train | 3.2 (0.2)         | 3.2 (0.4)        | <b>3.3</b> (0.2)  | 3.1 (0.0)         | 3.1 (0.4)        | 3.1 (0.1)  |
|            | Test  | 3.2 (0.3)         | 2.9 (0.4)        | <b>3.3</b> (0.2)  | 3.0 (0.2)         | 3.1 (0.5)        | 3.0 (0.2)  |
| Starpilot  | Train | 57.6 (0.9)        | 56.0 (1.5)       | 60.3 (0.4)        | <b>61.3</b> (2.0) | 55.0 (1.3)       | 55.0 (1.9) |
|            | Test  | 53.0 (1.7)        | 48.3 (2.0)       | 53.9 (2.4)        | <b>54.6</b> (2.4) | 49.6 (2.1)       | 48.6 (1.9) |
| Aggregated | Train | 22.5 (2.6)        | 28.3 (1.4)       | <b>35.0</b> (1.6) | 27.0 (1.8)        | 34.6 (1.8)       | 28.5 (1.2) |
|            | Test  | 16.4 (1.6)        | 15.7 (1.6)       | 18.6 (1.7)        | <b>20.0</b> (1.8) | 15.3 (1.9)       | 16.1 (2.2) |

Table 4: Performance on ProcGen game environments. Multi-task training in 4 environments in the **memory distribution**.

| Env        | Split | DeltaNet         | SRM-Delta         |
|------------|-------|------------------|-------------------|
| Dodgeball  | Train | <b>7.1</b> (0.2) | <b>7.1</b> (0.6)  |
|            | Test  | <b>6.4</b> (0.3) | 6.2 (0.6)         |
| Heist      | Train | 1.0 (0.3)        | <b>1.5</b> (0.1)  |
|            | Test  | 0.8 (0.2)        | <b>1.1</b> (0.3)  |
| Maze       | Train | 5.3 (0.4)        | <b>5.9</b> (0.2)  |
|            | Test  | <b>3.3</b> (0.6) | <b>3.3</b> (0.4)  |
| Miner      | Train | 32.3 (0.4)       | <b>34.5</b> (0.8) |
|            | Test  | 29.2 (1.1)       | <b>29.4</b> (0.7) |
| Aggregated | Train | 51.8 (2.6)       | 59.0(2.1)         |
|            | Test  | 38.0 (4.1)       | 38.5(3.2)         |
